# Supplementary material for: Loss of PI3K p110α in the Adipose Tissue Results in Infertility and Delayed Puberty Onset in Male Mice
Source: Biomed Res Int. 2017 Mar 5;2017:3756089. doi: 10.1155/2017/3756089 (PMC5357525; doi:10.1155/2017/3756089)
Supplement: Supplementary file 1 — White adipose tissue loss of p110α protein. [file 3756089.f1.zip]

Archive with 2 entries (2 files):
- New Microsoft Word Document.docx
- WB for Supp Fig 1_BMRI_1859526.pdf
