# Supplementary material for: Loss of PI3K p110α in the Adipose Tissue Results in Infertility and Delayed Puberty Onset in Male Mice
Source: Biomed Res Int. 2017 Mar 5;2017:3756089. doi: 10.1155/2017/3756089 (PMC5357525; doi:10.1155/2017/3756089)
Supplement: Supplementary file 1 — White adipose tissue loss of p110α protein. [file 3756089.f1.zip › New Microsoft Word Document.docx]

**Supplemental Fig. 1:** Adipose tissue-specific loss of p110 protein. Adipocytes were isolated from gonadal white fat pads of adult p110 knockout mice and their control (as described in 15). Isolated adipocytes from several animals of each genotype were pooled and subjected to Western blotting using a p110 specific antibody (Cell Signaling Antibody #4255, 1:1,000). β-actin (Cell Signaling, # 4970) served as a loading control. Relative density normalized to β-actin: 1.3 vs. 0.6 for controls (+/+) and knockouts ( -/-), respectively.

**Supplemental Methods:**

**Preparation of isolated adipocytes**

WAT was collected from mice anesthetized with ketamine-xylazine. White adipocytes were isolated with 3 mg/ml type I collagenase (Worthington Biomedical) in Krebs-Ringer bicarbonate solution-HEPES buffer, pH 7.4 (supplemented with 3% fatty acid-free bovine serum albumin). Adipocytes were filtered through 297-**μ**m polypropylene mesh, washed three times in Krebs-Ringer bicarbonate-HEPES buffer, and collected for experiments
